# Supplementary material
Source: PubMed Central journal article supplement (PMC4012698)

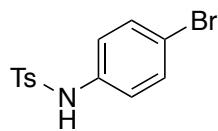

*N*-(4-bromophenyl)-4-methylbenzenesulfonamide

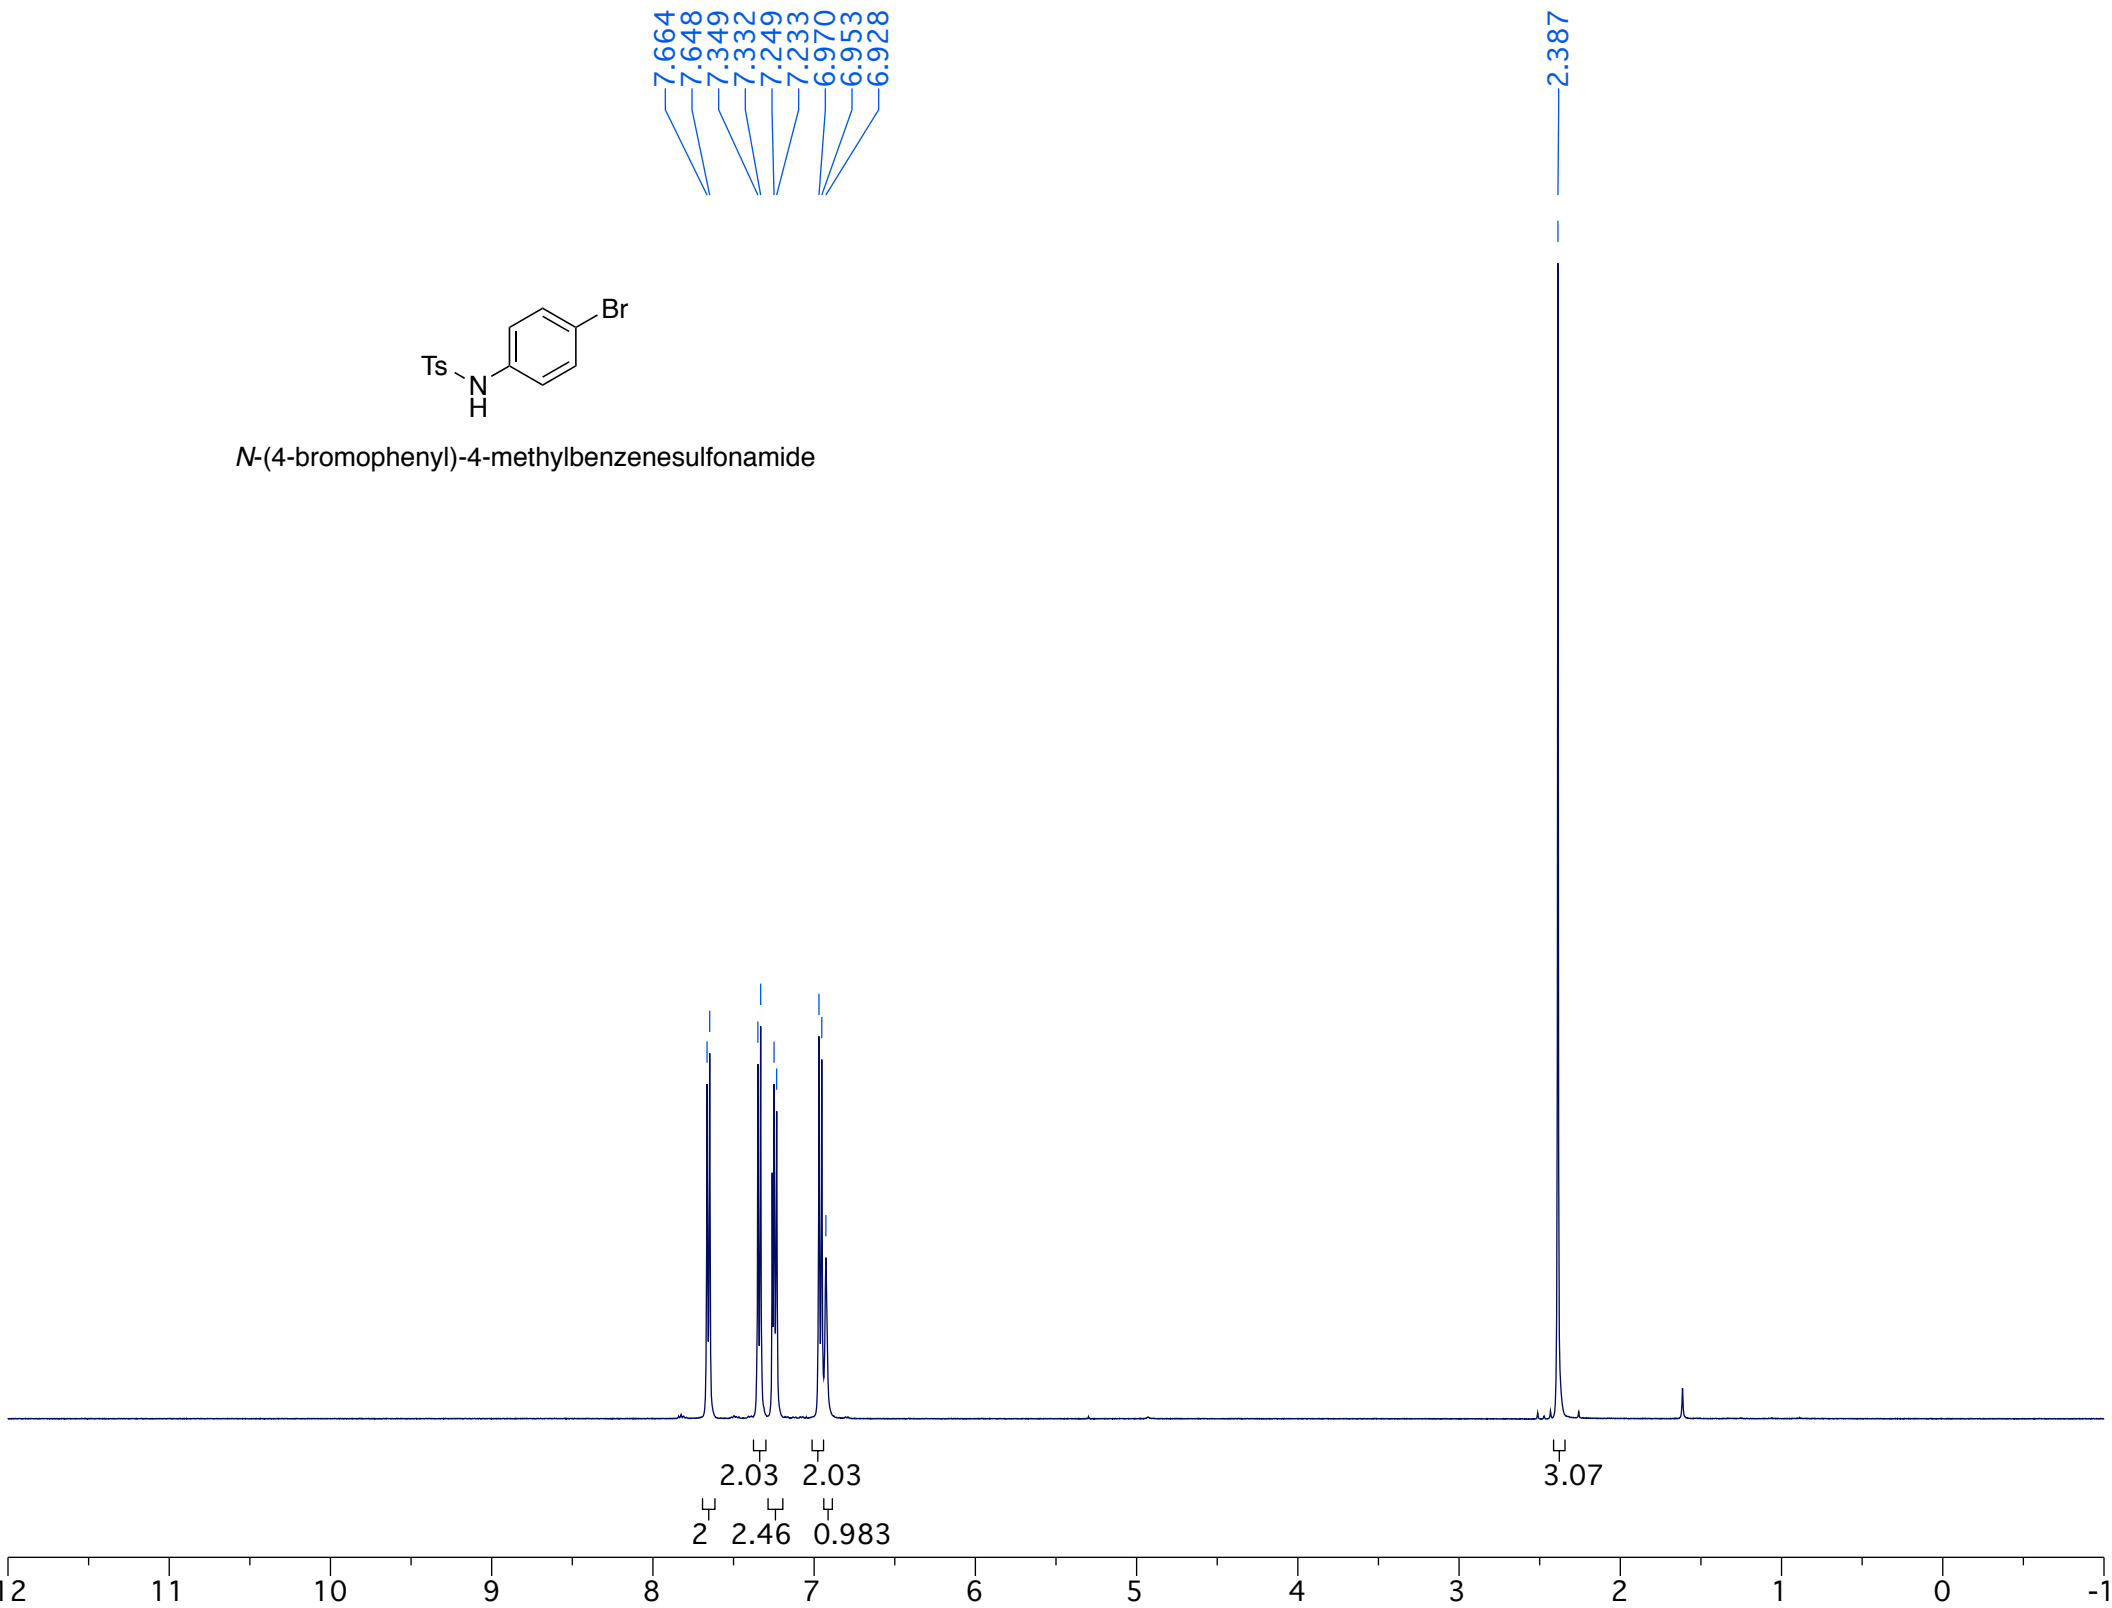

Supplement: NIHMS574476-supplement-NMR_001.pdf [file NIHMS574476-supplement-NMR_001.pdf]

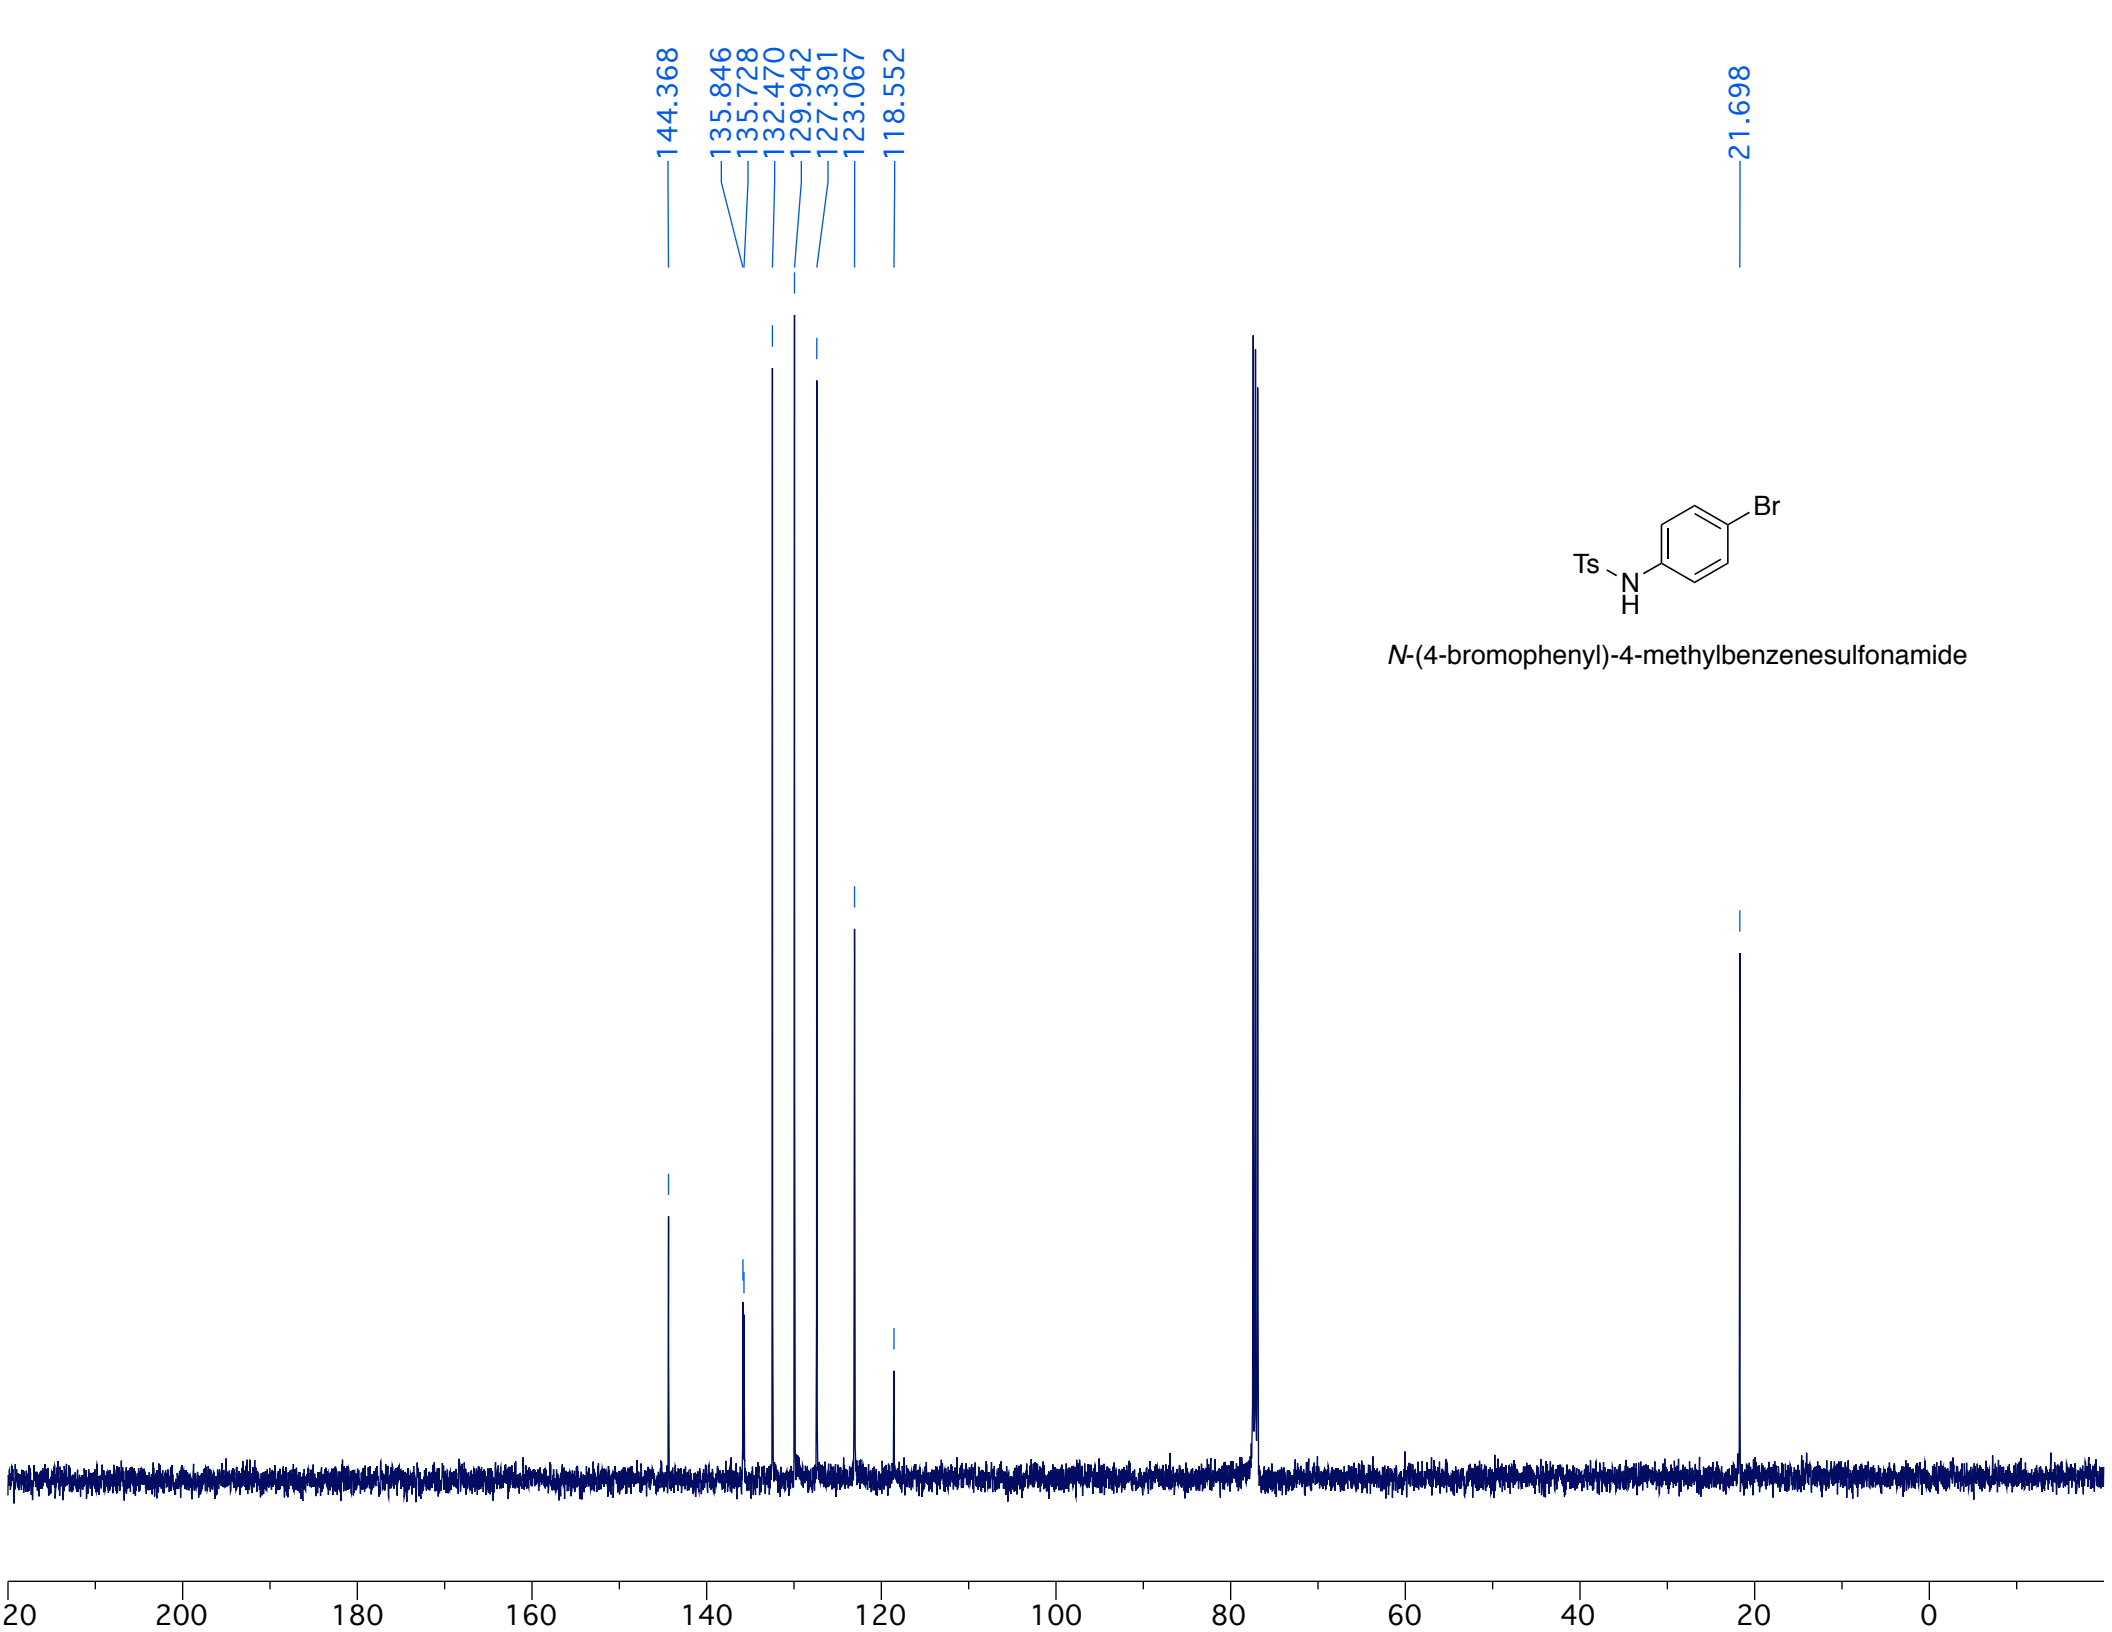

Supplement: NIHMS574476-supplement-NMR_002.pdf [file NIHMS574476-supplement-NMR_002.pdf]

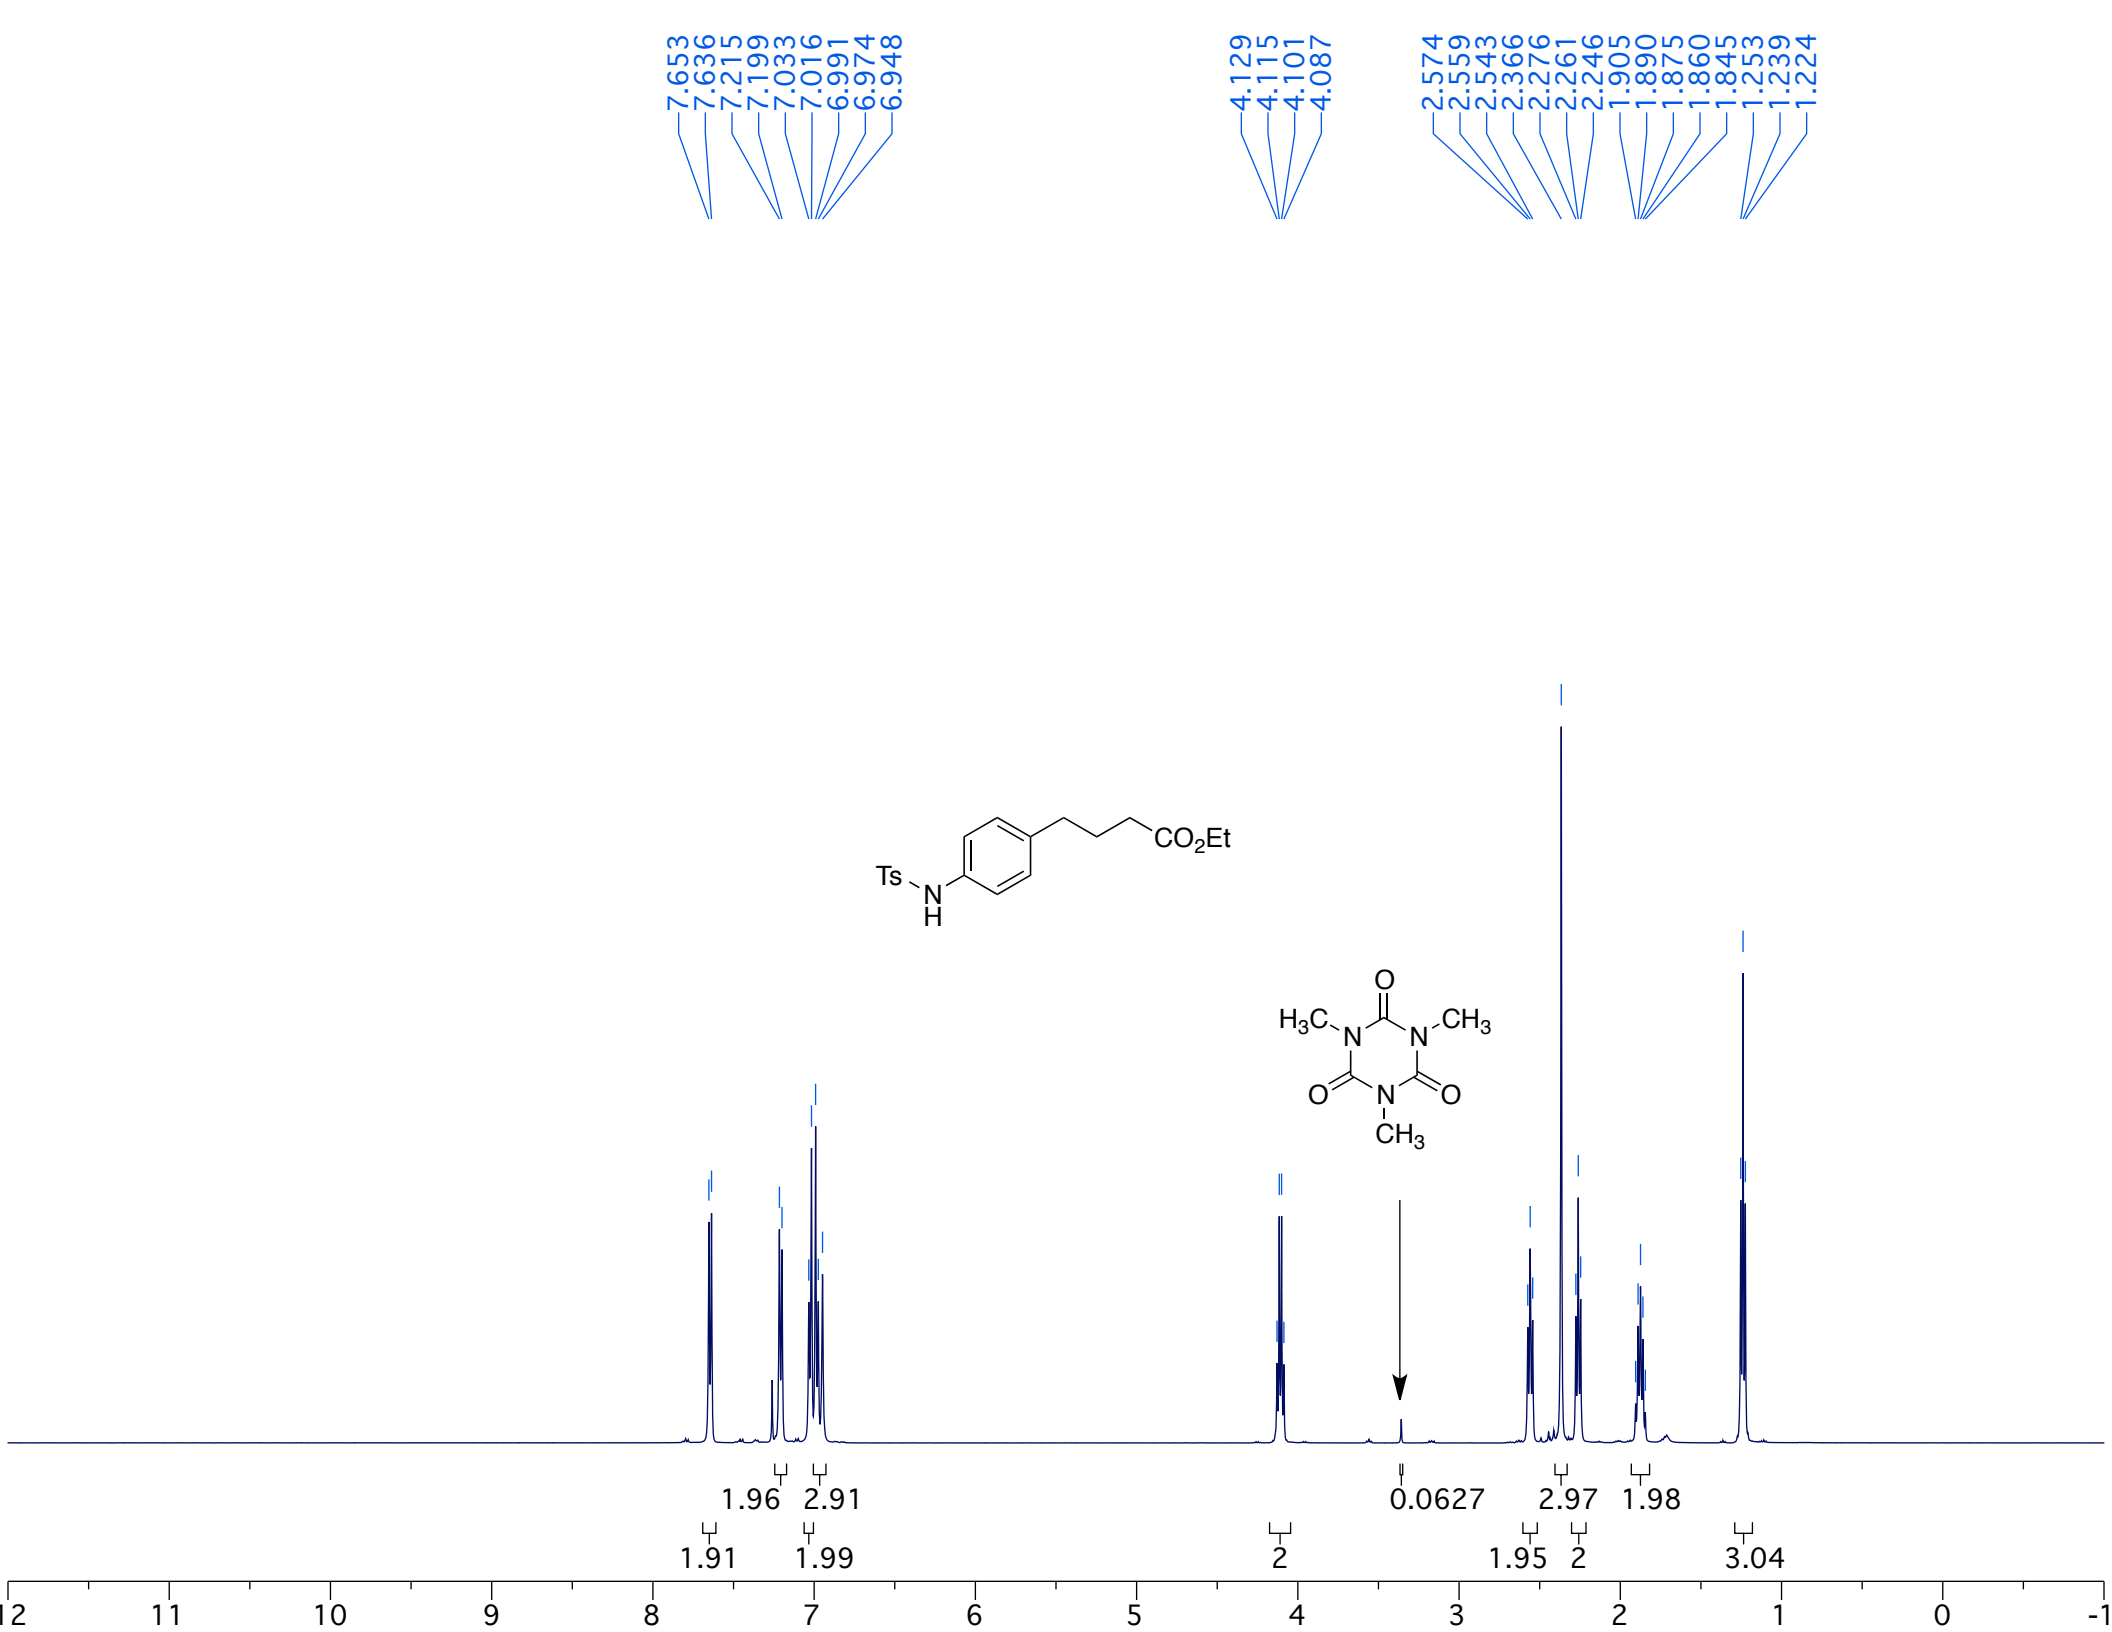

Supplement: NIHMS574476-supplement-NMR_003.pdf [file NIHMS574476-supplement-NMR_003.pdf]

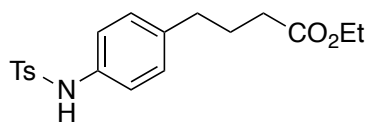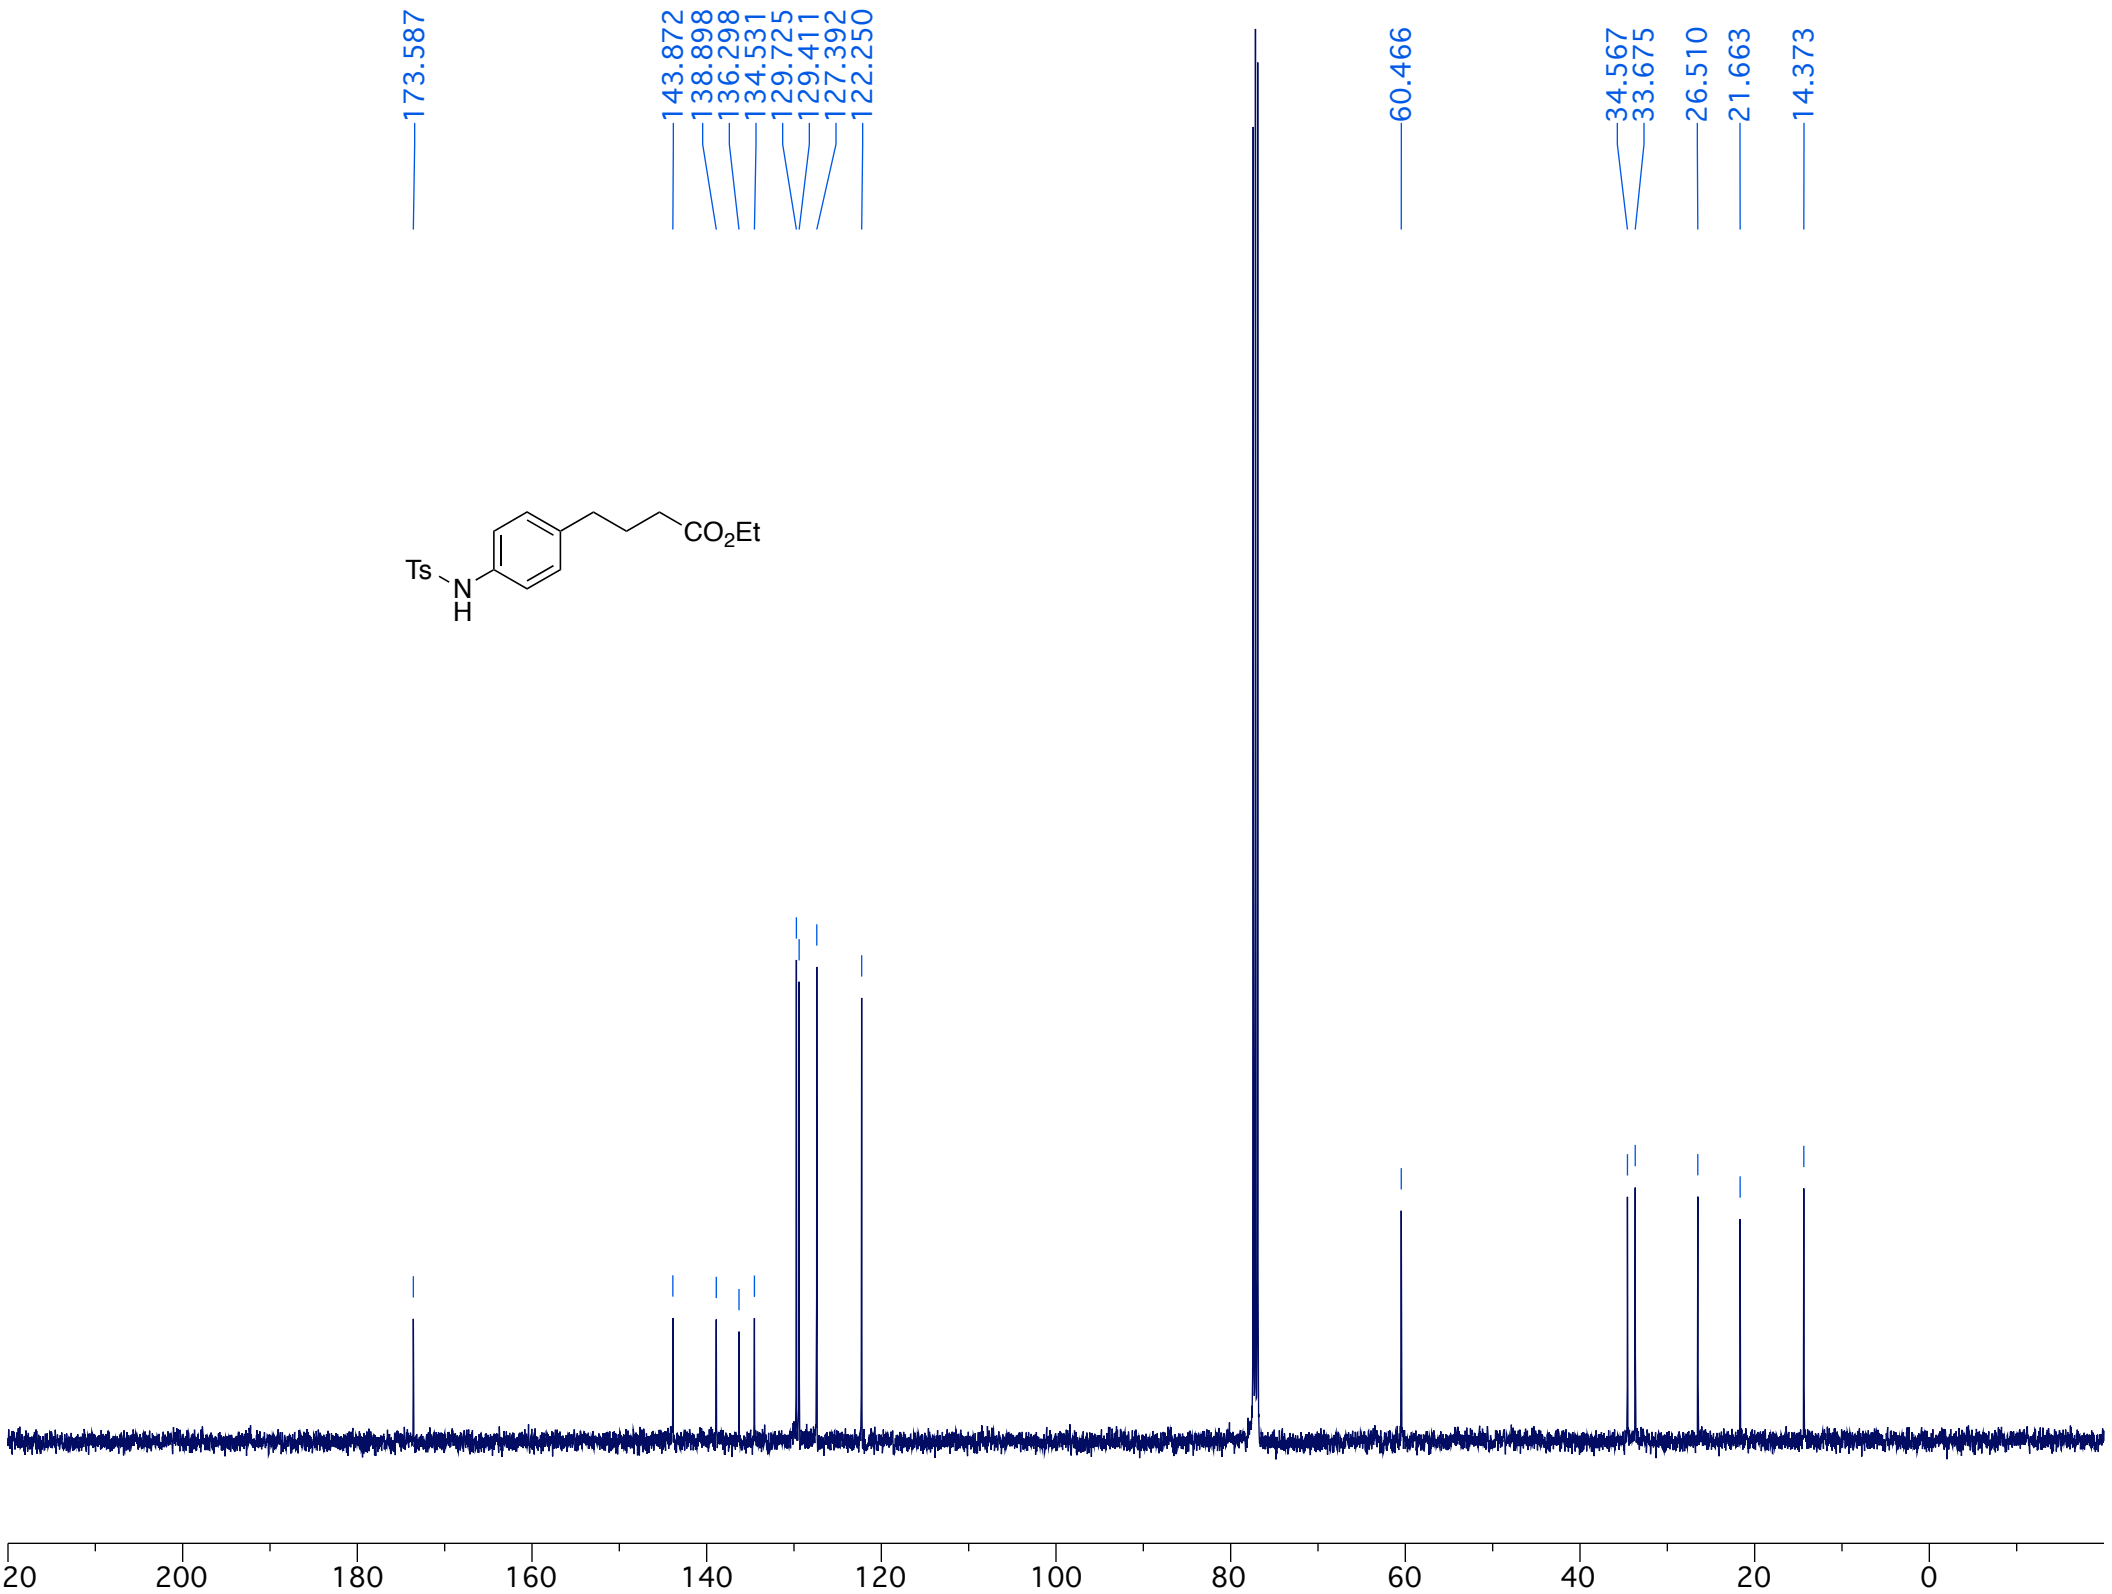

Supplement: NIHMS574476-supplement-NMR_004.pdf [file NIHMS574476-supplement-NMR_004.pdf]
